# Supplementary material
Source: publisher figshare collection journal article supplement (https://acs.figshare.com/ndownloader/files/20101694)
Supplement: Supplementary file 1 [file 20101694]

**Hierarchical amorphous carbon-coated Co/Co<sub>9</sub>S<sub>8</sub> nanoparticles on MoS<sub>2</sub> toward synergistic electrocatalytic water splitting**

*Qianqian Lin, Junmei Liang, Jiapeng Liu, Qicheng Zhang, Wenchao Peng, Yang Li, Fengbao Zhang and Xiaobin Fan\**

*School of Chemical Engineering and Technology, State Key Laboratory of Chemical Engineering, Collaborative Innovation Center of Chemical Science and Engineering, Tianjin University, Tianjin 300072, China*

*E-mail: [xiaobinfan@tju.edu.cn](mailto:xiaobinfan@tju.edu.cn)*

## Experimental methods

**Synthesis of amorphous carbon-coated Co nanoparticles:** In a typical synthesis, firstly, 0.291 g  $\text{Co}(\text{NO}_3)_2 \cdot 6\text{H}_2\text{O}$ , 0.224 g triethylene diamine (TEDA), and 0.166 g p-phthalic acid (PTA) were dissolved in 50 mL N,N-dimethylformamide solution to obtain a homogeneous solution. Then the mixture was evaporated at 80 °C to remove the solvent with stirred vigorously. The as-prepared dry powders were heated at 900 °C for 1 h under the protection of  $\text{N}_2$ , and the furnace was cooled to room temperature.

**Synthesis of carbon-coated  $\text{Co}/\text{Co}_9\text{S}_8$  combined  $\text{MoS}_2$ :** 50 mg ammonium tetrathiomolybdate (ATTM) was dissolved in 20 ml deionized water, sonicated 15 min for homogeneous mixing. Then 30 mg carbon coated Co nanoparticles was slowly added to the beaker and sonicated for 15 min. Then, the mixture was freeze-dried in lyophilization. The product was heated in 400 °C under  $\text{H}_2/\text{Ar}$  (5%/95%) with a rate of 5 °C/min and maintained for 1 h; typical sample was denoted as  $\text{Co}/\text{CoS}_x\text{--MoS}_2$ .

**Synthesis pure  $\text{MoS}_2$ :** 50 mg ammonium tetrathiomolybdate (ATTM) was dissolved in 20 ml deionized water and sonicated 15 min, then the mixture was freeze-dried in lyophilization. The product was heated in 400 °C under  $\text{H}_2/\text{Ar}$  (5%/95%) with a rate of 5 °C/min and maintained for 1 h.

**Electrode preparation and electrochemical measurements:** All the electrochemical measurements were performed at ambient temperature in a typical three-electrode electrochemical cell with an electrochemical station (CHI 660D electrochemical station) in 1M KOH. An Ag/AgCl (saturated KCl-filled) electrode was used as reference electrode. A glassy carbon electrode (3mm in diameter) was served as the support for the working electrode. A graphite rod was used as counter electrode. Typically, homogeneous catalyst ink was prepared by dispersing 5 mg of catalysts in 1 ml water-ethanol solution with volume ratio of 4:1 containing 50 $\mu\text{L}$  0.5 wt.% Nafion solution and sonicated for 1 h. In short, 5 $\mu\text{L}$  well-dispersed catalysts was dropped on the glassy carbon electrode surface and air-dried at room temperature for measurements. Linear sweep voltammetry was carried out with a scan rate of 5  $\text{mV} \cdot \text{s}^{-1}$

<sup>1</sup> for the polarization curves. The long-term electrochemical stability tests were obtained through CV scanning with continuous cycling at 100 mV·s<sup>-1</sup>. Electrochemical impedance spectroscopy was studied were evaluated with the frequency range from 100 kHz to 0.1 Hz. Time-dependent current density curves were operated by chronoamperometric measurements. All the potentials used in the paper here was converted to the reversible hydrogen electrode (RHE), based on the Nernst equation  $E_{\text{RHE}} = E_{\text{Ag/AgCl}} + 0.059 \text{ pH} + E^{\theta}_{\text{Ag/AgCl}}$ . All polarization curves were iR corrected.

**Calculation of Turnover Frequency (TOF):** The active site density and per-site TOF for the as-prepared Co/CoS<sub>x</sub>-MoS<sub>2</sub> were experimentally determined by an electrochemical approach<sup>1</sup>, using the following equation. Here it is assumed that all of the surface-active sites are fully exposed in the electrolyte.

$$\text{TOF} = I / (2NF)$$

I: current (A) during the linear sweep measurement.

The factor 1/2 is associated with the fact that producing one hydrogen molecule from two protons requires two electrons.

F: Faraday constant (96485 C/mol).

N: number of active sites (mol): cyclic voltammetry measurements (Figure S8) were acquired with a three-electrode configuration at various scan rates of 100 mV s<sup>-1</sup> in 1 M KOH solution. The surface-active sites were regarded to have a linear relationship with the integrated voltammetry charges because no obvious redox peak was observed in the entire potential window. If an electron is assumed to undergo both reduction and oxidation reactions, the upper limit of active number (N) can be estimated as:

$$N=Q/2F$$

Q is the total charge of the CV curve

For the Co/CoS<sub>x</sub>-MoS<sub>2</sub> electrode: the number of active sites was about  $9.742 \times 10^{-6} \text{ mol cm}^{-2}$ , and the TOF values at various overpotentials were obtained from the polarization curve (Figure S10, Supporting Information).

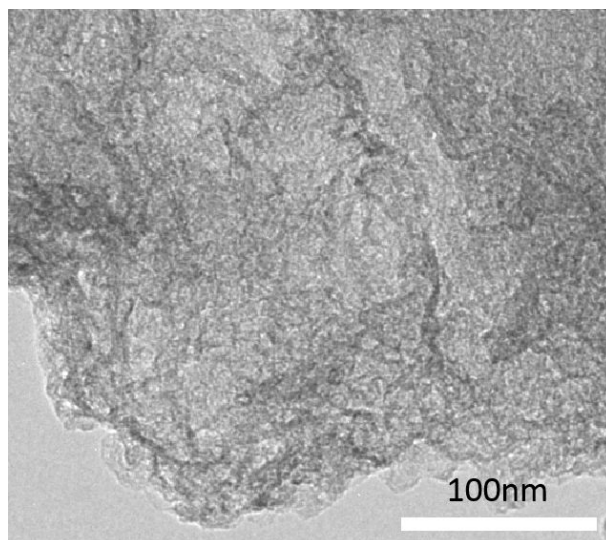

**Figure S1** TEM image of pristine MoS<sub>2</sub>

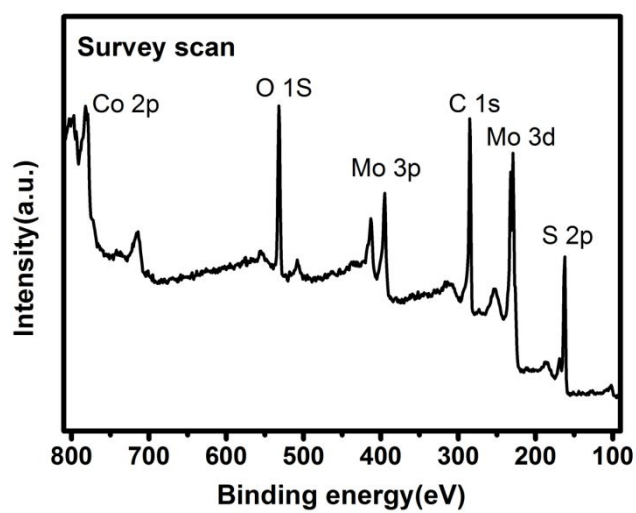

**Figure S2** XPS survey spectrum of the Co/CoS<sub>x</sub>-MoS<sub>2</sub>

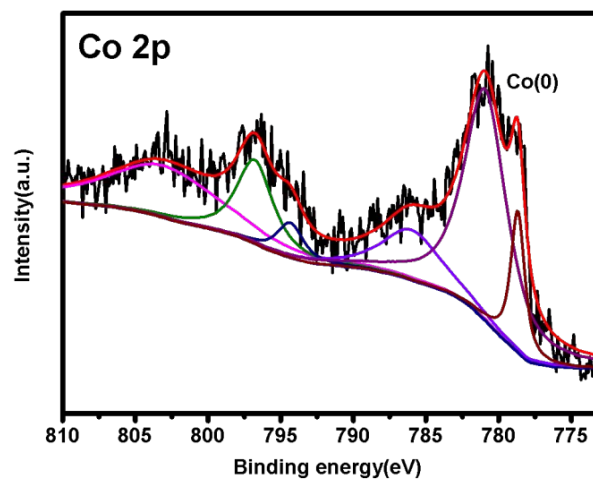

**Figure S3** high-resolution spectra of Co 2p for the carbon coated Co nanoparticles

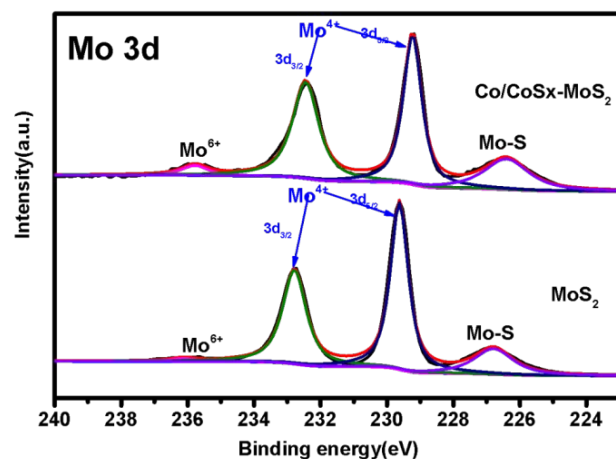

**Figure S4** high-resolution spectra of Mo 3d for the pristine MoS<sub>2</sub> and Co/CoS<sub>x</sub>-MoS<sub>2</sub>

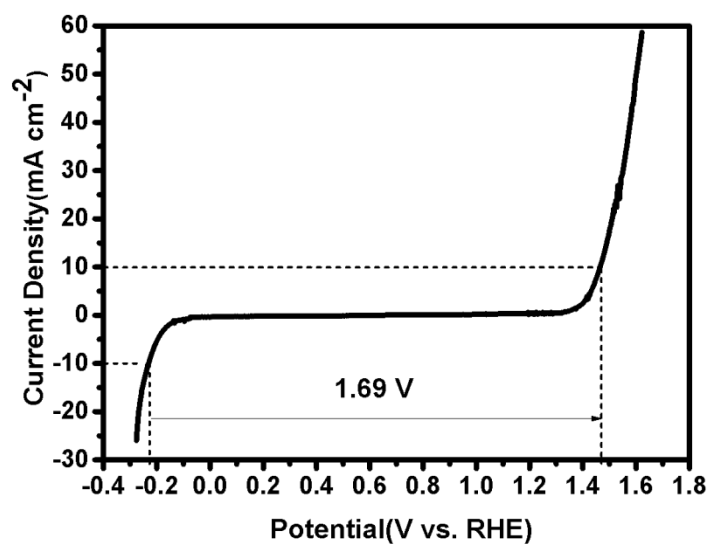

**Figure S5** Water splitting polarization of the Co/CoS<sub>x</sub>-MoS<sub>2</sub> in 1 M KOH

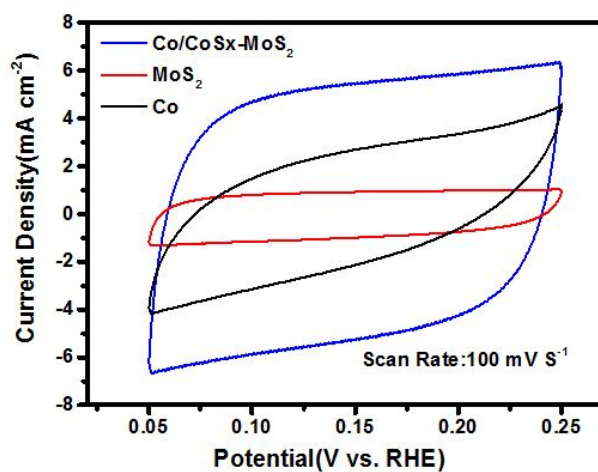

**Figure S6.** CV curve of the carbon-coated Co/Co<sub>9</sub>S<sub>8</sub>-MoS<sub>2</sub> obtained in 1M KOH electrolyte with a scan rate of 100 mV/s.

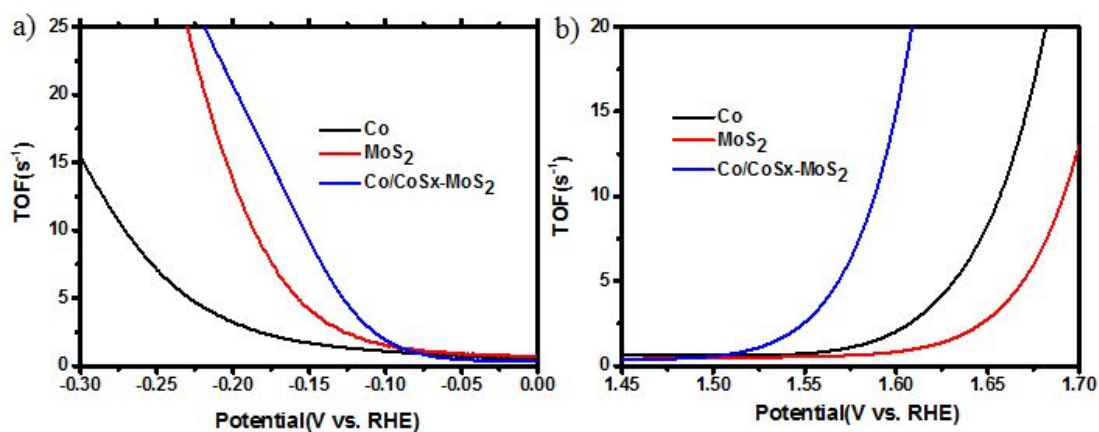

**Figure S7.** TOFs at various overpotentials in 1M KOH solution for HER a) for OER b).

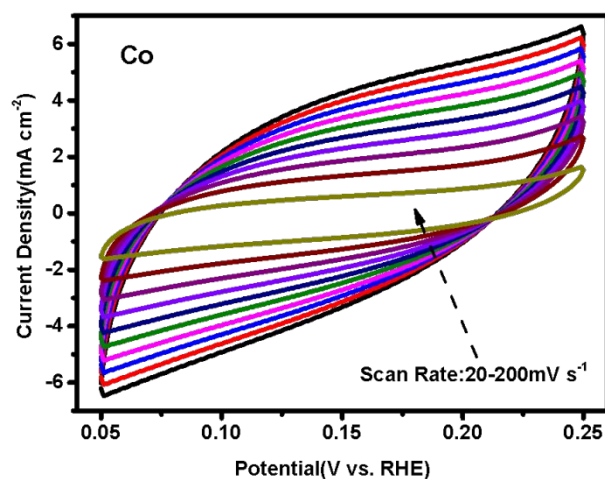

**Figure S8** Cyclic voltammograms (CV) of Co is taken in a potential window (0.05-0.25 V vs. Ag/AgCl) at various scan rates of 20 to 200  $\text{mV s}^{-1}$  in 1.0 M KOH solution

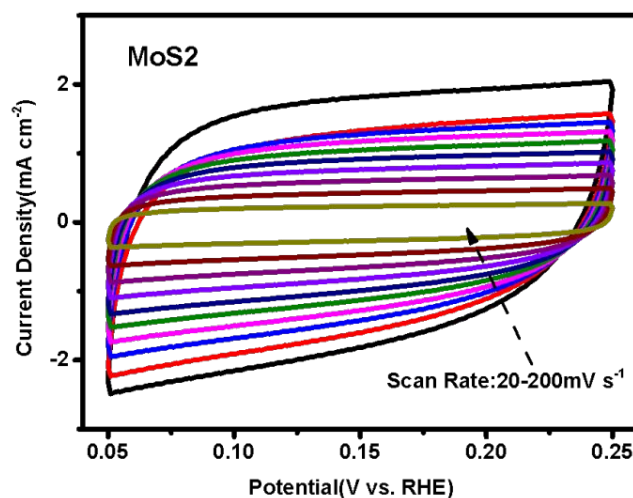

**Figure S9** Cyclic voltammograms (CV) of  $\text{MoS}_2$  is taken in a potential window (0.05-0.25 V vs. Ag/AgCl) at various scan rates of 20 to 200  $\text{mV s}^{-1}$  in 1.0 M KOH solution

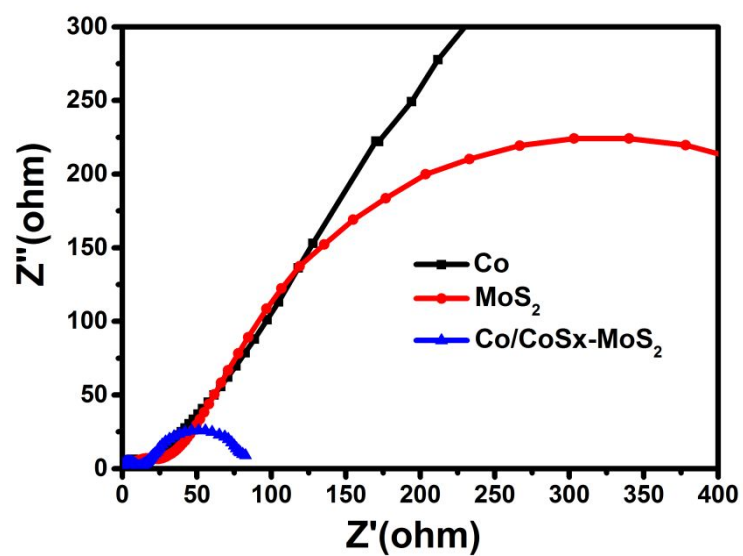

**Figure S10** Nyquist plots of carbon coated Co, MoS<sub>2</sub> and Co/CoS<sub>x</sub>-MoS<sub>2</sub> in 1 M KOH with an overpotential of 200 mV over the frequency range from 1000 kHz to 0.1 Hz.

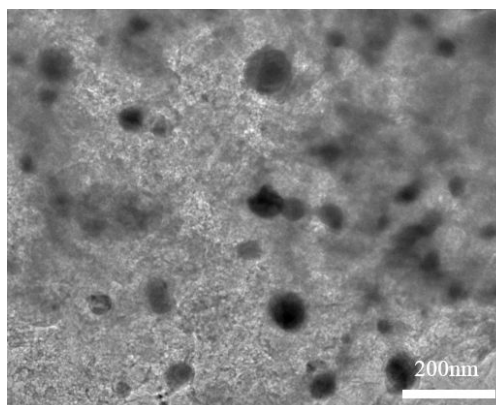

**Figure S11** TEM image of the Co/CoS<sub>x</sub>-MoS<sub>2</sub> after 1000 cycles CV test

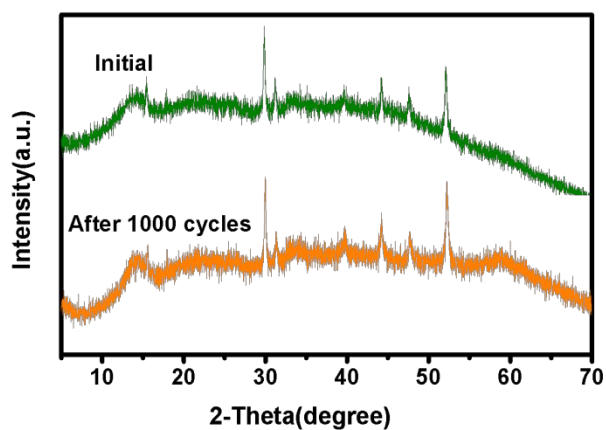

**Figure S12** XRD of the Co/CoS<sub>x</sub>-MoS<sub>2</sub> before and after 1000 cycles CV test

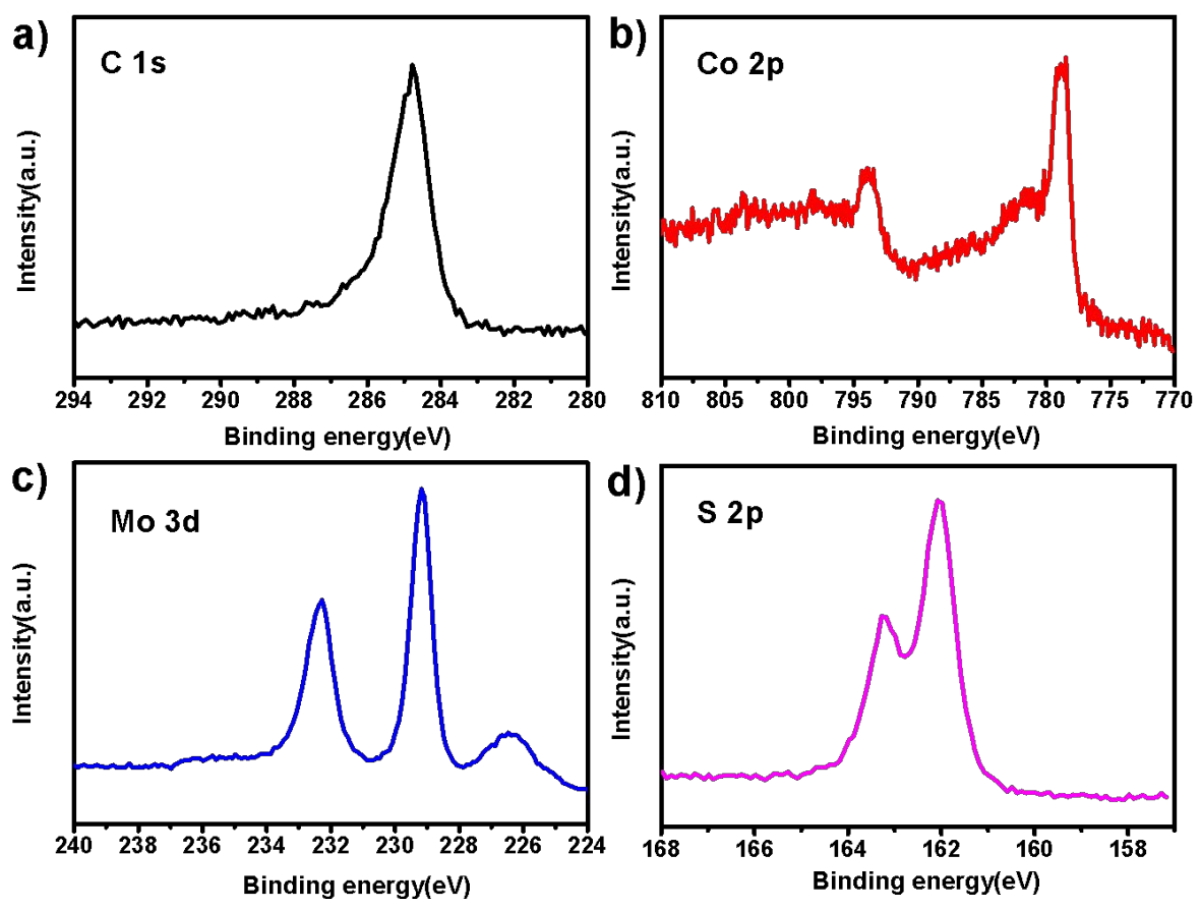

**Figure S13** XPS high-resolution spectra of a) C 1s, b) Co 2p, c) Mo 3d, and d) S 2p XPS spectra of the Co/CoS<sub>x</sub>-MoS<sub>2</sub> after 1000 cycles CV test



**Table S1.** Comparison of HER and OER activity data among various catalysts in 1 M KOH solution

| Materials                                                  | Reaction   | $\eta$ [V]             | Tafel slope<br>[mV dec <sup>-1</sup> ] | References                                              |
|------------------------------------------------------------|------------|------------------------|----------------------------------------|---------------------------------------------------------|
|                                                            |            | 10 mA cm <sup>-2</sup> |                                        |                                                         |
| <b>Co/CoS<sub>x</sub>-MoS<sub>2</sub></b>                  | <b>HER</b> | <b>128</b>             | <b>65</b>                              | <b>This work</b>                                        |
|                                                            | <b>OER</b> | <b>325</b>             | <b>74</b>                              |                                                         |
| Co <sub>9</sub> S <sub>8</sub> @MoS <sub>2</sub>           | HER        | 143                    | 117                                    | <i>ACS Appl Mater Interfaces</i> <sup>2</sup>           |
|                                                            | OER        | 340                    | 79                                     |                                                         |
| Co <sub>9</sub> S <sub>8</sub> @MoS <sub>2</sub> /CNFs     | HER        | 190                    | 110                                    | <i>Adv. Mater.</i> <sup>3</sup>                         |
|                                                            | OER        | 430                    | 61                                     |                                                         |
| Co/CoP-5                                                   | HER        | 253                    | 73.8                                   | <i>Adv. Energy Mater.</i> <sup>4</sup>                  |
|                                                            | OER        | 340                    | 79.5                                   |                                                         |
| Co-MoS <sub>2</sub>                                        | HER        | 203                    | 158                                    | <i>Energy Environ.</i> <sup>5</sup>                     |
|                                                            | OER        | -                      | -                                      |                                                         |
| Ni <sub>0.9</sub> Fe <sub>0.1</sub> PS <sub>3</sub> @MXene | HER        | 196                    | 140                                    | <i>Adv. Energy Mater.</i> <sup>6</sup>                  |
|                                                            | OER        | 312                    | 48.9                                   |                                                         |
| Co <sub>9</sub> S <sub>8</sub> HNSs                        | HER        | 267                    | 139                                    | <i>Nanoscale</i> <sup>7</sup>                           |
|                                                            | OER        | 342                    | 104                                    |                                                         |
| CoxMoy@NC                                                  | HER        | 218                    | 73.5                                   | <i>J. Mater. Chem. A</i> <sup>8</sup>                   |
|                                                            | OER        | 330                    | 48.7                                   |                                                         |
| Co <sub>9</sub> S <sub>8</sub> -NixSy/NF                   | HER        | 163                    | 88                                     | <i>J. Mater. Chem. A</i> <sup>9</sup>                   |
|                                                            | OER        | -                      | -                                      |                                                         |
| Ni-Co-P HNBs                                               | HER        | 107                    | 46                                     | <i>Energy &amp; Environmental Science</i> <sup>10</sup> |
|                                                            | OER        | 270                    | 76                                     |                                                         |

### Supplementary References

- (1) Sun, J.; Ren, M.; Yu, L.; Yang, Z.; Xie, L.; Tian, F.; Yu, Y.; Ren, Z.; Chen, S.; Zhou, H., Highly Efficient Hydrogen Evolution from a Mesoporous Hybrid of Nickel Phosphide Nanoparticles Anchored on Cobalt Phosphosulfide/Phosphide Nanosheet Arrays. *Small* **2019**, *15* (6), e1804272.
- (2) Bai, J. M.; T. Guo, D. Wang, S. Mao, B. Cao, M., Co<sub>9</sub>S<sub>8</sub>@MoS<sub>2</sub> Core-Shell Heterostructures as Trifunctional Electrocatalysts for Overall Water Splitting and Zn-Air Batteries. *ACS Appl Mater Interfaces* **2018**, *10* (2), 1678-1689.
- (3) Zhu, H.; Zhang, J.; Yanzhang, R.; Du, M.; Wang, Q.; Gao, G.; Wu, J.; Wu, G.; Zhang, M.; Liu, B.; Yao, J.; Zhang, X., When cubic cobalt sulfide meets layered molybdenum disulfide: a core-shell system toward synergetic electrocatalytic water splitting. *Adv Mater* **2015**, *27* (32), 4752-9.
- (4) Xue, Z.-H.; Su, H.; Yu, Q.-Y.; Zhang, B.; Wang, H.-H.; Li, X.-H.; Chen, J.-S., Janus Co/CoP Nanoparticles as Efficient Mott-Schottky Electrocatalysts for Overall Water Splitting in Wide pH Range. *Advanced Energy Materials* **2017**, *7* (12).
- (5) Zhang, J.; Wang, T.; Liu, P.; Liu, S.; Dong, R.; Zhuang, X.; Chen, M.; Feng, X., Engineering water dissociation sites in MoS<sub>2</sub> nanosheets for accelerated electrocatalytic hydrogen production. *Energy & Environmental Science* **2016**, *9* (9), 2789-2793.
- (6) Du, C.-F.; Dinh, K. N.; Liang, Q.; Zheng, Y.; Luo, Y.; Zhang, J.; Yan, Q., Self-Assemble and In Situ Formation of Ni<sub>1-x</sub>Fe<sub>x</sub>PS<sub>3</sub> Nanomosaic-Decorated MXene Hybrids for Overall Water Splitting. *Advanced Energy Materials* **2018**, *8* (26).
- (7) Ma, X.; Zhang, W.; Deng, Y.; Zhong, C.; Hu, W.; Han, X., Phase and composition controlled synthesis of cobalt sulfide hollow nanospheres for electrocatalytic water splitting. *Nanoscale* **2018**, *10* (10), 4816-4824.
- (8) Jiang, J.; Liu, Q.; Zeng, C.; Ai, L., Cobalt/molybdenum carbide@N-doped carbon as a bifunctional electrocatalyst for hydrogen and oxygen evolution reactions. *Journal of Materials Chemistry A* **2017**, *5* (32), 16929-16935.
- (9) Ansovini, D.; Jun Lee, C. J.; Chua, C. S.; Ong, L. T.; Tan, H. R.; Webb, W. R.; Raja, R.; Lim, Y.-F., A highly active hydrogen evolution electrocatalyst based on a cobalt-nickel sulfide composite electrode. *Journal of Materials Chemistry A* **2016**, *4* (25), 9744-9749.
- (10) Hu, E.; Feng, Y.; Nai, J.; Zhao, D.; Hu, Y.; Lou, X. W., Construction of hierarchical Ni-Co-P hollow nanobricks with oriented nanosheets for efficient overall water splitting. *Energy & Environmental Science* **2018**, *11* (4), 872-880.
